# Supplementary material for: A bivalent compound targeting CCR5 and the mu opioid receptor treats inflammatory arthritis pain in mice without inducing pharmacologic tolerance
Source: PubMed Central journal article supplement (PMC6062996; doi:10.1186/s13075-018-1661-5), 2018-07-27

## **Supplemental Figures**

**Dutta, R. et al.**

**A bivalent compound targeting CCR5 and the mu opioid receptor treats inflammatory arthritis pain in mice without inducing pharmacologic tolerance.**

### **Supplemental Figure Legends**

**Supplemental Figure 1: Structure of MCC22.** MCC22 is a bivalent pharmacophore comprising a mu opioid receptor (MOR) agonist and a CCR5 antagonist joined by a 22-atom spacer.

**Supplemental Figure 2: Representative histologic sections.** The images show histologic sections of ankles from non-arthritic control animals and arthritic K/B.g7 mice treated with vehicle (DMSO) or daily MCC22 for 9 days (8  $\mu$ mol/kg/dose). Photomicrographs were obtained with a 4x objective. Scale bars indicate 500 microns.

## Supplemental Figure 1

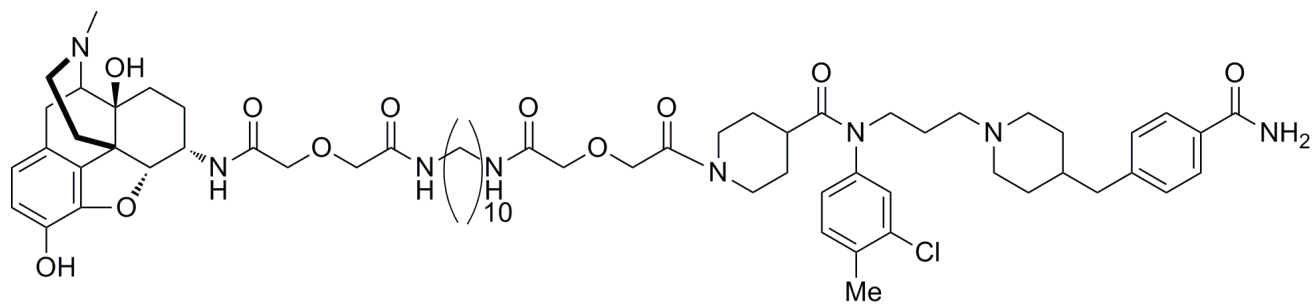

Mu opioid receptor  
(MOR) agonist

22-atom spacer

CCR5 antagonist

**Supplemental Figure 2**

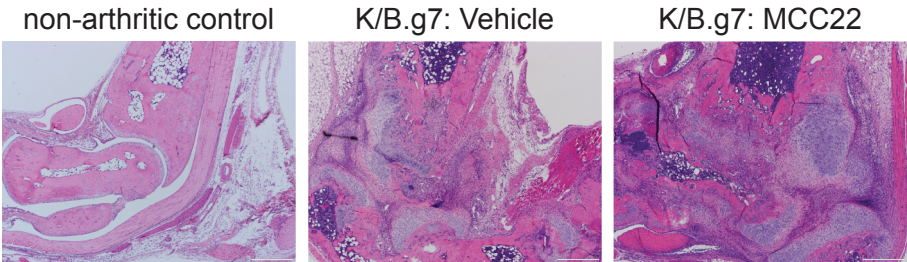

Supplement: 13075_2018_1661_MOESM1_ESM.pdf [file 13075_2018_1661_MOESM1_ESM.pdf]
